# Supplementary material for: The Genomic Architecture of Population Divergence between Subspecies of the European Rabbit
Source: PLOS journal article supplement (doi:10.1371/journal.pgen.1003519), 2014-08-28

FIG. S3

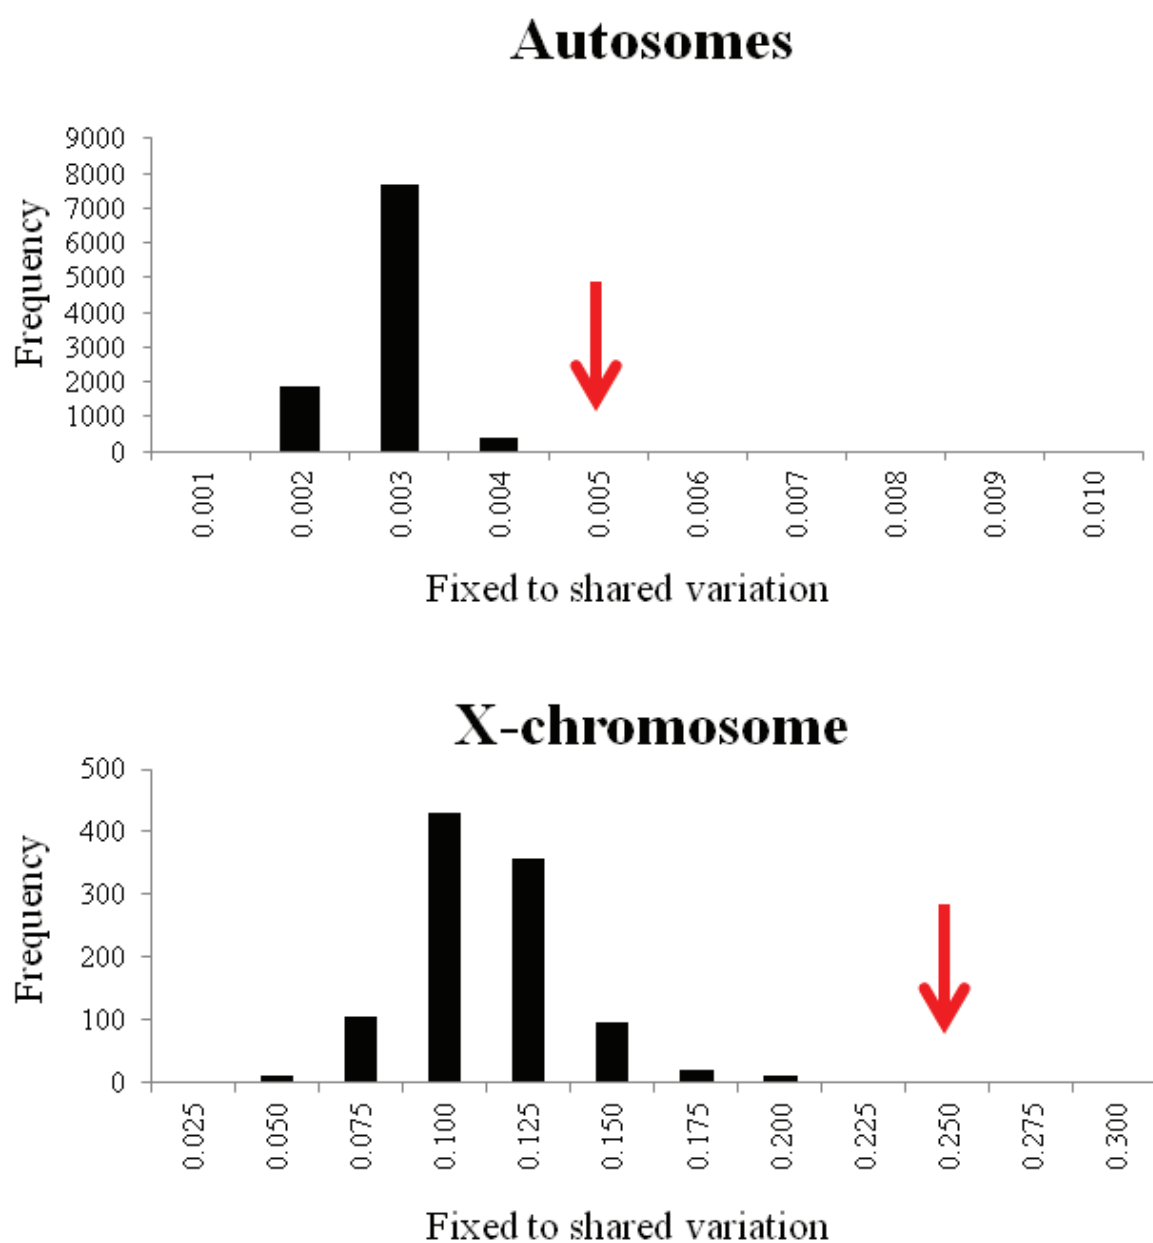

Supplement: S5 (10.1371/journal.pgen.1003519.s005) [file journal.pgen.1003519.s005]
