# Supplementary material for: The Genomic Architecture of Population Divergence between Subspecies of the European Rabbit
Source: PLOS journal article supplement (doi:10.1371/journal.pgen.1003519), 2014-08-28
Supplement: S9 (10.1371/journal.pgen.1003519.s009) [file journal.pgen.1003519.s009]

**Table S4. List of GO terms overrepresented in the set of genes found within the 102 candidate regions.**

| Category           | Term description                                                    | Term       | <i>P</i> -value | Fold Enrichment | Count |
|--------------------|---------------------------------------------------------------------|------------|-----------------|-----------------|-------|
| Biological process | regulation of transcription                                         | GO:0045449 | 0.00434         | 1.472           | 48    |
| Biological process | transcription                                                       | GO:0006350 | 0.00607         | 1.521           | 40    |
| Biological process | chromatin organization                                              | GO:0006325 | 0.01394         | 2.313           | 12    |
| Biological process | nuclear-transcribed mRNA catabolic process, nonsense-mediated decay | GO:0000184 | 0.01706         | 7.083           | 4     |
| Biological process | nuclear-transcribed mRNA catabolic process                          | GO:0000956 | 0.02733         | 5.964           | 4     |
| Biological process | actin filament-based process                                        | GO:0030029 | 0.02919         | 2.452           | 9     |
| Biological process | chromatin modification                                              | GO:0016568 | 0.02976         | 2.285           | 10    |
| Biological process | macromolecule catabolic process                                     | GO:0009057 | 0.03071         | 1.657           | 20    |
| Biological process | regulation of translation                                           | GO:0006417 | 0.03734         | 3.207           | 6     |
| Biological process | chromosome organization                                             | GO:0051276 | 0.04232         | 1.879           | 13    |
| Biological process | mRNA catabolic process                                              | GO:0006402 | 0.0451          | 4.927           | 4     |
| Molecular Function | ubiquitin thiolesterase activity                                    | GO:0004221 | 0.0019          | 5.198           | 7     |
| Molecular Function | guanyl-nucleotide exchange factor activity                          | GO:0005085 | 0.00635         | 3.211           | 9     |
| Molecular Function | thiolester hydrolase activity                                       | GO:0016790 | 0.00723         | 4.006           | 7     |
| Molecular Function | DNA binding                                                         | GO:0003677 | 0.01943         | 1.412           | 40    |
| Molecular Function | vitamin B6 binding                                                  | GO:0070279 | 0.02716         | 4.293           | 5     |
| Molecular Function | pyridoxal phosphate binding                                         | GO:0030170 | 0.02716         | 4.293           | 5     |
| Molecular Function | cofactor binding                                                    | GO:0048037 | 0.04543         | 2.113           | 10    |
| Molecular Function | protein domain specific binding                                     | GO:0019904 | 0.04601         | 2.415           | 8     |
| Cellular component | membrane-enclosed lumen                                             | GO:0031974 | 0.00705         | 1.656           | 29    |
| Cellular component | nuclear lumen                                                       | GO:0031981 | 0.00904         | 1.769           | 23    |
| Cellular component | nucleoplasm                                                         | GO:0005654 | 0.00979         | 2.002           | 17    |

|                    |                               |            |         |       |    |
|--------------------|-------------------------------|------------|---------|-------|----|
| Cellular component | organelle lumen               | GO:0043233 | 0.01536 | 1.595 | 27 |
| Cellular component | intracellular organelle lumen | GO:0070013 | 0.01536 | 1.595 | 27 |
| Cellular component | nucleoplasm part              | GO:0044451 | 0.0328  | 1.884 | 14 |
| Cellular component | plasma membrane part          | GO:0044459 | 0.04081 | 1.39  | 33 |

---
