# Supplementary material for: The Genomic Architecture of Population Divergence between Subspecies of the European Rabbit
Source: PLOS journal article supplement (doi:10.1371/journal.pgen.1003519), 2014-08-28
Supplement: S12 (10.1371/journal.pgen.1003519.s012) [file journal.pgen.1003519.s012]

**Table S7. Levels and patterns of nucleotide variation at synonymous sites for highly (top 5%) and lowly (bottom 5%) expressed genes. Significant comparisons are highlighted in red.**

| Subspecies             | Expression category | FPKM <sup>a</sup> | $\pi(\%)^b$ | $D_t^c$ |
|------------------------|---------------------|-------------------|-------------|---------|
| <i>O. c. algirus</i>   | Highly              | 552.4             | 0.912       | -0.447  |
|                        | Lowly               | 8.0               | 0.863       | -0.318  |
| <i>O. c. cuniculus</i> | Highly              | 582.7             | 0.626       | -0.445  |
|                        | Lowly               | 7.8               | 0.870       | -0.217  |

Unweighted average values among genes. Genes with less than 50 bp of synonymous sites were excluded.

<sup>a</sup>Median fragments per kilobase of gene model and million reads values among all *O. c. algirus* and *O. c. cuniculus* individuals and averaged across genes for each expression category.

<sup>b</sup>Average number of pairwise differences in a sample [68].

<sup>c</sup>Tajima's  $D$  [69].
